# Supplementary material for: A pyrosequencing-based method for genotyping pathogenic serotypes of S. suis
Source: Royal Society of Chemistry journal article supplement (doi:10.1039/c1ay05285c), 2011-01-01
Supplement: c1ay05285c.pdf [file c1ay05285c.pdf]

Supplemental Material

**TABLE S-1.** The information on all the serotypes that result in same pyrosequencing pattern

| Region | Sequence(5'-3') <sup>a</sup>         | Serotype                            |
|--------|--------------------------------------|-------------------------------------|
| CR177  | TGCCCTTCTA                           | 1/2, 1, 6,8,11,16,25,28,29          |
|        | TGC <u>A</u> CTTCTG <sup>b</sup>     | 2,7,9,10,14,15, 24, 27              |
|        | TGC <u>A</u> CTTCTA                  | 3,12, 21,                           |
|        | TGCGCTTGTG                           | 4                                   |
|        | TGCGCTTCTG                           | 5,13                                |
|        | <u>C</u> GC <u>G</u> CTTCTG          | 17,18,19,23,31                      |
|        | TGC <u>A</u> CTTCTT <u>T</u> G       | 20,22,26                            |
|        | TGCCCT <u>A</u> CTA                  | 30                                  |
|        | <u>C</u> GC <u>A</u> CT <u>A</u> CTA | 32,34                               |
|        | TGCT <u>T</u> CT <u>A</u> CTA        | 33                                  |
| CR248  | CTATCATT                             | 1/2,2,8,11,14, 15,28,29,            |
|        | <u>T</u> TATCATT                     | 1,10,32,33,34                       |
|        | CTATC <u>A</u> CT                    | 3,12,13,25                          |
|        | <u>T</u> TAC <u>C</u> ACT            | 4,5,6,7,9 ,16,20,21,22,24,26,30     |
|        | <u>T</u> TATC <u>A</u> CT            | 17,18,19,23                         |
|        | <u>T</u> TAG <u>C</u> ACT            | 31                                  |
|        | <u>T</u> TAC <u>C</u> ATT            | 27                                  |
| CR443  | CCAGACTTCTT                          | 1/2,1,4,5,6,10,13,16,17,19,21,24,30 |
|        | CC <u>G</u> GACTTCTT                 | 2,8,14,15                           |
|        | <u>T</u> CAGACTT <u>C</u> CT         | 3,                                  |
|        | <u>T</u> CAGACTTCTT                  | 12,18,23                            |
|        | CCA <u>A</u> AC <u>T</u> CTT         | 7,20,22,25,26                       |
|        | CCA <u>A</u> ACTT <u>C</u> CT        | 9                                   |

---

|           |                       |                                                                                     |
|-----------|-----------------------|-------------------------------------------------------------------------------------|
|           | <u>CCAGACCTCCT</u>    | 11,27                                                                               |
|           | <u>TCAAACCTCTT</u>    | 28                                                                                  |
|           | <u>TCAA</u> ACTTCTT   | 29                                                                                  |
|           | CCA <u>AA</u> CCTTTT  | 31                                                                                  |
|           | <u>ACAAA</u> ATTCTT   | 32,34                                                                               |
|           | CCAGAC <u>GTTT</u>    | 33                                                                                  |
| CR462 AND | TTCGACAG              | 1/2,13,17,19                                                                        |
| CR418     | TTCGAT <u>AGG</u>     | 1                                                                                   |
|           | TTCGAT <u>AG</u>      | 2,3,4,5,6,8,10,11,12,14,15,18,21,23                                                 |
|           | <u>GTCGATAGG</u>      | 7                                                                                   |
|           | <u>GTCGATAG</u>       | 9                                                                                   |
|           | TTC <u>A</u> ACAG     | 16                                                                                  |
|           | <u>GTTAATAG</u>       | 20,22,26                                                                            |
|           | <u>CTTTATAG</u>       | 24,27                                                                               |
|           | <u>GTTAATAGG</u>      | 25,28,31                                                                            |
|           | CTT <u>A</u> ATAG     | 29                                                                                  |
|           | <u>TTTTACAG</u>       | 30                                                                                  |
|           | TTCG <u>G</u> AAG     | 32                                                                                  |
|           | TTC <u>A</u> ATAG     | 33                                                                                  |
|           | TTC <u>A</u> GAAAG    | 34                                                                                  |
| 16S RRNA  | CAGTATTTACCG          | 1/2,1,2,3,4,5,6,7,8,9,10,11,12,13,14,15,16,17,18,19,<br>21,22,23, 25,27,28,29,30,31 |
|           | CAGTATTTA <u>TCG</u>  | 20,24,26                                                                            |
|           | CAGT <u>CTTTG</u> ACG | 32,34                                                                               |
|           | <u>GAGCTTTAGTGG</u>   | 33                                                                                  |

---

<sup>a</sup> The sequence of the target region followed the 3' end of the primer

<sup>b</sup> The letters were labeled by underline in the primers denoted by the different bases from the sequence on the target regions of the serotype 1/2.



**Fig. S-1** Comparative nucleotide sequence analysis of the target regions on 16S rDNA among 34 *S. suis* serotypes and 16 others *Streptococcus*

Note: The sign “\*” represents the same nucleotide of the serotype which was in the first line. *S.pneumoniae*, *S.thermophilu*, *S.intermedius*, *S.haemolyticus* and *S.marimammalium* were abbreviated to *S.pneum*, *S.thermop*, *S.interme*, *S..haemoly* and *S.marima* respectively.

| scryptype | P <sub>eF-106</sub> | CR177        | P <sub>eR-187</sub> | CR248     | P <sub>eR-258</sub> | CR418 | P <sub>eR-422</sub> | CR443        | P <sub>eR-453</sub> | CR462     | P <sub>eR-466</sub> | P <sub>eR-478</sub> |
|-----------|---------------------|--------------|---------------------|-----------|---------------------|-------|---------------------|--------------|---------------------|-----------|---------------------|---------------------|
| SS1/2     | -TTGAAAG            | -AICTTCCCGT  | TCCTG               | -TTACTATC | GAAAG               | -GACA | TTTT                | -TTCTTCAGACC | AACC                | -GCITTTGA | -GACGATG            |                     |
| SS01      | *****               | *****        | ****                | *****T    | ****G**T*           | ****  | *****               | ****         | ****                | ****      | *****               |                     |
| SS02      | *****               | *****A***    | ****                | *****     | ******T*            | ****  | *****G**            | ****         | ****                | ****      | *****               |                     |
| SS03      | *****               | *****A***    | ****                | **C*****  | ******T*            | ****  | **T*****T           | *GT*         | ****                | ****      | *****               |                     |
| SS04      | *****               | G**G**G***   | ****                | **C**C**T | ******T*            | ****  | *****               | ****         | ****                | ****      | *****               |                     |
| SS05      | *****               | G*****G***   | ****                | **C**C**T | ******T*            | ****  | *****               | ****         | ****                | ****      | *****               |                     |
| SS06      | *****               | *****A***    | ****                | **C**C**T | ******T*            | ****  | **C*****            | ****         | ****                | ****      | *****               |                     |
| SS07      | *****               | G*****A***   | ****                | **C**C**T | ****G**T*           | ****  | ****C**A**          | **T*         | **G*                | ****      | G**                 |                     |
| SS08      | *****               | *****        | ****                | *****     | ******T*            | ****  | *****G**            | **T*         | ****                | ****      | *****               |                     |
| SS09      | *****               | G*****A***   | ****                | **C**C**T | ******T*            | ****  | **C***A**           | **T*         | **G*                | ****      | *****               |                     |
| SS10      | *****               | G*****A***   | ****                | *****T    | ******T*            | ****  | *****               | ****         | ****                | ****      | *****               |                     |
| SS11      | *****               | *****        | ****                | *****     | ******T*            | ****  | **C*****            | ****         | ****                | ****      | *****               |                     |
| SS12      | *****               | *****A***    | ****                | **C*****  | ******T*            | ****  | *****T              | *GT*         | ****                | ****      | *****               |                     |
| SS13      | *****               | G*****G***   | ****                | **C*****  | ******T*            | ****  | *****               | ****         | ****                | ****      | *****               |                     |
| SS14      | *****               | G*****A***   | ****                | *****     | ******T*            | ****  | *****G**            | ****         | ****                | ****      | *****               |                     |
| SS15      | *****               | G*****A***   | ****                | *****     | ******T*            | ****  | *****G**            | ****         | ****                | ****      | *****               |                     |
| SS16      | *****               | *****        | ****                | **C**C**T | ******T*            | ****  | *****               | ****         | A**                 | ****      | *****               |                     |
| SS17      | *****               | G*****G**C   | ****                | **C*****T | ******T*            | ****  | *****               | ****         | ****                | ****      | *****               |                     |
| SS18      | *****               | G*****G**C   | ****                | **C*****T | ******T*            | ****  | *****T              | *GT*         | ****                | ****      | *****               |                     |
| SS19      | *****               | G*****G**C   | ****                | **C*****T | ******T*            | ****  | *****               | ****         | ****                | ****      | *****               |                     |
| SS20      | *****               | GTT*****A*** | ****                | **C**C**T | ******T*            | ****  | ****C**A**          | ****         | AT*G                | ****      | C*                  |                     |
| SS21      | *****               | *****A***    | ****                | **C**C**T | ******T*            | ****  | *****               | ****         | ****                | ****      | *****               |                     |
| SS22      | *****               | GTT*****A*** | ****                | **C**C**T | ******T*            | ****  | ****C**A**          | ****         | AT*G                | ****      | G*C                 |                     |
| SS23      | *****               | G*****G**C   | ****                | **C*****T | ******T*            | ****  | *****T              | *GT*         | ****                | ****      | *****               |                     |
| SS24      | *****               | G*****A***   | ****                | **C**C**T | ******T*            | ****  | *****               | *GT*         | T**C                | ****      | *****               |                     |
| SS25      | *****               | *****        | ****                | **C*****  | ****G**T*           | ****  | ****C**A**          | ****         | AT*G                | ****      | *****               |                     |
| SS26      | *****               | GTT*****A*** | ****                | **C**C**T | ******T*            | ****  | ****C**A**          | ****         | AT*G                | ****      | C*                  |                     |
| SS27      | *****               | G*****A***   | ****                | ****C**T  | ******T*            | ****  | **C*****            | *GT*         | T**C                | ****      | *****               |                     |
| SS28      | *****               | *****        | ****                | *****     | ****G**T*           | ****  | ****C**A**T         | ****         | AT*G                | ****      | *****               |                     |
| SS29      | *****               | *****        | ****                | *****     | ******T*            | ****  | *****A**T           | *GT*         | A**C                | ****      | *****               |                     |
| SS30      | *****               | ***A*****    | ****                | **C**C**T | ******T*            | ****  | *****               | ****         | T**T                | ****      | *****               |                     |
| SS31      | *****               | G*****G**C   | ****                | **C**G**T | ****G**T*           | ****  | ***T**C**A**        | **T*         | AT*G                | ****      | *****               |                     |
| SS32      | *****               | C**CA**A**C  | ****                | *****T    | ******AG            | C**   | ****A**A**A         | *G**         | ****C               | ****      | T**                 |                     |
| SS33      | *****               | ***A**T**C   | ****                | *****T    | ******T*            | A**   | ***T**G*****        | *T*          | A**                 | ****      | *****               |                     |
| SS34      | *****               | **CA**A**C   | ****                | *****T    | ******AG            | G**   | ****A**A**A         | *G**         | A**C                | ****      | T**                 |                     |

Fig. S-2

**Fig. S-2** Comparative nucleotide sequence analysis of the target regions for pyrosequencing on *cpn60* gene of the *S. suis* serotypes

Note: The sign “\*” represents the same nucleotide of the serotype which was in the first line.
